# Supplementary material for: Diel periodicity and visual cues guide oviposition behavior in Phlebotomus papatasi, vector of old-world cutaneous leishmaniasis
Source: PLoS Negl Trop Dis. 2019 Mar 5;13(3):e0007165. doi: 10.1371/journal.pntd.0007165 (PMC6420040; doi:10.1371/journal.pntd.0007165)
Supplement: S1 Data — (XLSX) [file pntd.0007165.s002.xlsx]

## Sheet: OvipositionActivity
Day	Time	Cage	flies
1	3	1	0
1	3	2	0
1	3	3	0
1	3	4	0
1	3	5	0
1	3	6	0
1	3	7	0
1	3	8	0
1	3	9	0
1	3	10	0
2	3	1	3
2	3	2	0
2	3	3	0
2	3	4	0
2	3	5	0
2	3	6	0
2	3	7	0
2	3	8	0
2	3	9	0
2	3	10	17
3	3	1	0
3	3	2	8
3	3	3	2
3	3	4	0
3	3	5	0
3	3	6	1
3	3	7	0
3	3	8	5
3	3	9	1
3	3	10	6
4	3	1	18
4	3	2	0
4	3	3	3
4	3	4	0
4	3	5	0
4	3	6	2
4	3	7	0
4	3	8	0
4	3	9	0
4	3	10	10
1	6	1	1
1	6	2	18
1	6	3	0
1	6	4	0
1	6	5	14
1	6	6	0
1	6	7	0
1	6	8	0
1	6	9	0
1	6	10	0
2	6	1	0
2	6	2	0
2	6	3	0
2	6	4	0
2	6	5	11
2	6	6	4
2	6	7	1
2	6	8	1
2	6	9	5
2	6	10	12
3	6	1	0
3	6	2	0
3	6	3	7
3	6	4	4
3	6	5	0
3	6	6	6
3	6	7	0
3	6	8	7
3	6	9	5
3	6	10	0
4	6	1	14
4	6	2	0
4	6	3	0
4	6	4	9
4	6	5	0
4	6	6	9
4	6	7	0
4	6	8	7
4	6	9	3
4	6	10	0
1	9	1	0
1	9	2	0
1	9	3	8
1	9	4	0
1	9	5	13
1	9	6	1
1	9	7	1
1	9	8	0
1	9	9	0
1	9	10	3
2	9	1	0
2	9	2	0
2	9	3	0
2	9	4	0
2	9	5	3
2	9	6	1
2	9	7	2
2	9	8	3
2	9	9	3
2	9	10	2
3	9	1	0
3	9	2	0
3	9	3	2
3	9	4	0
3	9	5	1
3	9	6	12
3	9	7	8
3	9	8	26
3	9	9	0
3	9	10	0
1	12	1	0
1	12	2	0
1	12	3	8
1	12	4	0
1	12	5	13
1	12	6	1
1	12	7	1
1	12	8	0
1	12	9	0
1	12	10	3
2	12	1	0
2	12	2	0
2	12	3	0
2	12	4	0
2	12	5	3
2	12	6	1
2	12	7	2
2	12	8	3
2	12	9	3
2	12	10	2
3	12	1	0
3	12	2	0
3	12	3	2
3	12	4	0
3	12	5	1
3	12	6	12
3	12	7	8
3	12	8	26
3	12	9	0
3	12	10	0
1	15	1	0
1	15	2	0
1	15	3	0
1	15	4	0
1	15	5	0
1	15	6	0
1	15	7	24
1	15	8	0
1	15	9	0
1	15	10	0
2	15	1	0
2	15	2	0
2	15	3	0
2	15	4	0
2	15	5	0
2	15	6	0
2	15	7	0
2	15	8	0
2	15	9	0
2	15	10	0
3	15	1	0
3	15	2	0
3	15	3	0
3	15	4	0
3	15	5	17
3	15	6	15
3	15	7	0
3	15	8	0
3	15	9	4
3	15	10	9
4	15	1	0
4	15	2	0
4	15	3	14
4	15	4	0
4	15	5	0
4	15	6	0
4	15	7	3
4	15	8	11
4	15	9	7
4	15	10	2
1	18	1	0
1	18	2	0
1	18	3	0
1	18	4	0
1	18	5	2
1	18	6	0
1	18	7	0
1	18	8	0
1	18	9	0
1	18	10	0
2	18	1	0
2	18	2	0
2	18	3	0
2	18	4	0
2	18	5	0
2	18	6	2
2	18	7	0
2	18	8	2
2	18	9	1
2	18	10	7
3	18	1	0
3	18	2	0
3	18	3	1
3	18	4	0
3	18	5	24
3	18	6	2
3	18	7	0
3	18	8	4
3	18	9	1
3	18	10	26
4	18	1	1
4	18	2	0
4	18	3	8
4	18	4	8
4	18	5	1
4	18	6	1
4	18	7	5
4	18	8	30
4	18	9	6
4	18	10	26
1	21	1	0
1	21	2	17
1	21	3	0
1	21	4	0
1	21	5	3
1	21	6	0
1	21	7	1
1	21	8	1
1	21	9	7
1	21	10	0
2	21	1	2
2	21	2	0
2	21	3	17
2	21	4	0
2	21	5	25
2	21	6	0
2	21	7	18
2	21	8	20
2	21	9	30
2	21	10	10
3	21	1	4
3	21	2	4
3	21	3	11
3	21	4	17
3	21	5	12
3	21	6	9
3	21	7	8
3	21	8	1
3	21	9	70
3	21	10	9
4	21	1	0
4	21	2	0
4	21	3	15
4	21	4	4
4	21	5	0
4	21	6	1
4	21	7	105
4	21	8	58
4	21	9	2
4	21	10	5
1	24	1	0
1	24	2	0
1	24	3	0
1	24	4	8
1	24	5	0
1	24	6	0
1	24	7	1
1	24	8	1
1	24	9	0
1	24	10	0
2	24	1	0
2	24	2	0
2	24	3	0
2	24	4	0
2	24	5	0
2	24	6	0
2	24	7	8
2	24	8	0
2	24	9	34
2	24	10	5
3	24	1	0
3	24	2	0
3	24	3	0
3	24	4	0
3	24	5	0
3	24	6	8
3	24	7	35
3	24	8	1
3	24	9	9
3	24	10	0
4	24	1	0
4	24	2	2
4	24	3	0
4	24	4	0
4	24	5	0
4	24	6	0
4	24	7	0
4	24	8	1
4	24	9	6
4	24	10	7

## Sheet: SearchActivity
Day	Time	Cage	flies
day 1	15:00	1-1	2
day 1	18:00	1-1	0
day 1	21:00	1-1	0
day 1	24:00	1-1	1
day 1	3:00	1-1	0
day 1	6:00	1-1	8
day 1	9:00	1-1	6
day 1	12:00	1-1	0
day 2	15:00	1-1	0
day 2	18:00	1-1	0
day 2	21:00	1-1	2
day 2	24:00	1-1	2
day 2	3:00	1-1	0
day 2	6:00	1-1	5
day 2	9:00	1-1	1
day 2	12:00	1-1	1
day 1	15:00	1-2	1
day 1	18:00	1-2	0
day 1	21:00	1-2	0
day 1	24:00	1-2	0
day 1	3:00	1-2	0
day 1	6:00	1-2	4
day 1	9:00	1-2	2
day 1	12:00	1-2	3
day 2	15:00	1-2	1
day 2	18:00	1-2	0
day 2	21:00	1-2	0
day 2	24:00	1-2	2
day 2	3:00	1-2	0
day 2	6:00	1-2	4
day 2	9:00	1-2	3
day 2	12:00	1-2	1
day 1	15:00	1-3	0
day 1	18:00	1-3	0
day 1	21:00	1-3	2
day 1	24:00	1-3	1
day 1	3:00	1-3	3
day 1	6:00	1-3	4
day 1	9:00	1-3	3
day 1	12:00	1-3	0
day 2	15:00	1-3	0
day 2	18:00	1-3	0
day 2	21:00	1-3	0
day 2	24:00	1-3	0
day 2	3:00	1-3	0
day 2	6:00	1-3	3
day 2	9:00	1-3	4
day 2	12:00	1-3	2
day 1	15:00	1-4	0
day 1	18:00	1-4	1
day 1	21:00	1-4	0
day 1	24:00	1-4	0
day 1	3:00	1-4	1
day 1	6:00	1-4	0
day 1	9:00	1-4	1
day 1	12:00	1-4	1
day 2	15:00	1-4	0
day 2	18:00	1-4	0
day 2	21:00	1-4	2
day 2	24:00	1-4	1
day 2	3:00	1-4	0
day 2	6:00	1-4	4
day 2	9:00	1-4	3
day 2	12:00	1-4	0
day 1	15:00	1-5	1
day 1	18:00	1-5	0
day 1	21:00	1-5	1
day 1	24:00	1-5	2
day 1	3:00	1-5	2
day 1	6:00	1-5	3
day 1	9:00	1-5	4
day 1	12:00	1-5	0
day 2	15:00	1-5	0
day 2	18:00	1-5	0
day 2	21:00	1-5	3
day 2	24:00	1-5	0
day 2	3:00	1-5	0
day 2	6:00	1-5	1
day 2	9:00	1-5	2
day 2	12:00	1-5	1
day 1	15:00	1-6	0
day 1	18:00	1-6	0
day 1	21:00	1-6	0
day 1	24:00	1-6	0
day 1	3:00	1-6	0
day 1	6:00	1-6	5
day 1	9:00	1-6	2
day 1	12:00	1-6	0
day 2	15:00	1-6	0
day 2	18:00	1-6	0
day 2	21:00	1-6	0
day 2	24:00	1-6	0
day 2	3:00	1-6	2
day 2	6:00	1-6	8
day 2	9:00	1-6	2
day 2	12:00	1-6	1
day 1	15:00	1-7	0
day 1	18:00	1-7	0
day 1	21:00	1-7	1
day 1	24:00	1-7	0
day 1	3:00	1-7	0
day 1	6:00	1-7	2
day 1	9:00	1-7	4
day 1	12:00	1-7	1
day 2	15:00	1-7	0
day 2	18:00	1-7	0
day 2	21:00	1-7	1
day 2	24:00	1-7	3
day 2	3:00	1-7	4
day 2	6:00	1-7	6
day 2	9:00	1-7	2
day 2	12:00	1-7	0
day 1	15:00	1-8	1
day 1	18:00	1-8	0
day 1	21:00	1-8	1
day 1	24:00	1-8	1
day 1	3:00	1-8	1
day 1	6:00	1-8	2
day 1	9:00	1-8	1
day 1	12:00	1-8	0
day 2	15:00	1-8	0
day 2	18:00	1-8	0
day 2	21:00	1-8	1
day 2	24:00	1-8	2
day 2	3:00	1-8	2
day 2	6:00	1-8	4
day 2	9:00	1-8	1
day 2	12:00	1-8	1
day 1	15:00	1-9	0
day 1	18:00	1-9	1
day 1	21:00	1-9	2
day 1	24:00	1-9	1
day 1	3:00	1-9	2
day 1	6:00	1-9	3
day 1	9:00	1-9	1
day 1	12:00	1-9	0
day 2	15:00	1-9	0
day 2	18:00	1-9	0
day 2	21:00	1-9	1
day 2	24:00	1-9	1
day 2	3:00	1-9	1
day 2	6:00	1-9	9
day 2	9:00	1-9	1
day 2	12:00	1-9	0
day 1	15:00	1-10	1
day 1	18:00	1-10	0
day 1	21:00	1-10	2
day 1	24:00	1-10	0
day 1	3:00	1-10	0
day 1	6:00	1-10	1
day 1	9:00	1-10	2
day 1	12:00	1-10	0
day 2	15:00	1-10	0
day 2	18:00	1-10	1
day 2	21:00	1-10	0
day 2	24:00	1-10	2
day 2	3:00	1-10	2
day 2	6:00	1-10	6
day 2	9:00	1-10	2
day 2	12:00	1-10	1

## Sheet: TemporalPreference
BIOTimePeriod	Treatment	Control	Responders		Averaged number of flies between day 1 and day 2 for each cage and used these averages for the paired-t-test
18-21	0	1	1		Treatment	Control
18-21	0	1	1		0	0.5
18-21	0	3	3		0	0.5
18-21	1	0	1		0.5	1.5
18-21	0	0	0		0.5	0
18-21	2	1	3		1	0
18-21	1	1	2		1	0.5
18-21	0	0	0		0.5	0.5
18-21	0	0	0
18-21	1	0	1
18-21	0	0	0
18-21	2	0	2
18-21	0	0	0
18-21	0	0	0
	0.5	0.5
BIOTimePeriod	Treatment	Control	Responders		Treatment	Control
0-3	3	2	5		2	1
0-3	1	0	1		1	0.5
0-3	1	2	3		1	1.5
0-3	2	0	2		1	1
0-3	3	2	5		3	1.5
0-3	1	0	1		1.5	1
0-3	1	2	3		0.5	1.5
0-3	1	0	1
0-3	1	1	2
0-3	1	1	2
0-3	0	2	2
0-3	3	1	4
0-3	2	2	4
0-3	0	1	1
	1.42857	1.14286
BIOTimePeriod	Treatment	Control	Responders		Treatment	Control
3-6	1	0	1		1	0
3-6	3	2	5		2	1.5
3-6	0	0	0		0.5	1
3-6	4	1	5		2	0.5
3-6	6	0	6		4	1
3-6	3	1	4		2	1
3-6	2	0	2		1.5	1
3-6	1	0	1
3-6	1	1	2
3-6	1	2	3
3-6	0	0	0
3-6	2	2	4
3-6	1	1	2
	1.92308	0.769231	0.0411186
BIOTimePeriod	Treatment	Control	Responders		Treatment	Control
9-12	0	1	1		0	1
9-12	1	0	1		0.5	0
9-12	0	0	0		0	0
9-12	1	1	2		0.5	0.5
9-12	0	0	0		0.5	0
9-12	1	0	1		0.5	0
9-12	1	1	2		0.5	1.5
9-12	0	1	1
9-12	0	0	0
9-12	0	0	0
9-12	0	0	0
9-12	1	0	1
9-12	0	0	0
9-12	0	2	2
